# Supplementary material for: Recyclable poly-m-phenylenediamine selectively recovers gold from acidic solutions
Source: Royal Society of Chemistry journal article supplement (doi:10.1039/d3nj01885g), 2023-01-01
Supplement: d3nj01885g1.pdf [file d3nj01885g1.pdf]

## Recyclable poly-m-phenylenediamine selectively recovers gold from acidic solutions

Min Wang, Zhiwei Huang, Zhongmin Feng and Zhuqing Wang \*

Anhui Key Laboratory of Photoelectric-Magnetic Functional Materials, Anqing Normal  
University. Anqing 246000, China. E-mail: wangzhuqing@vip.163.com

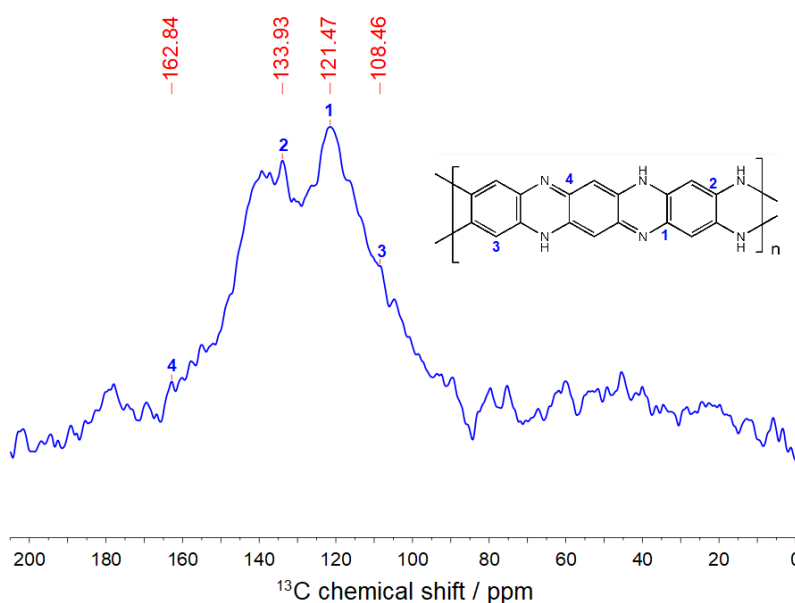

Fig. S1 Solid-state  $^{13}\text{C}$  NMR spectrum and the inferred structure of PmPD.

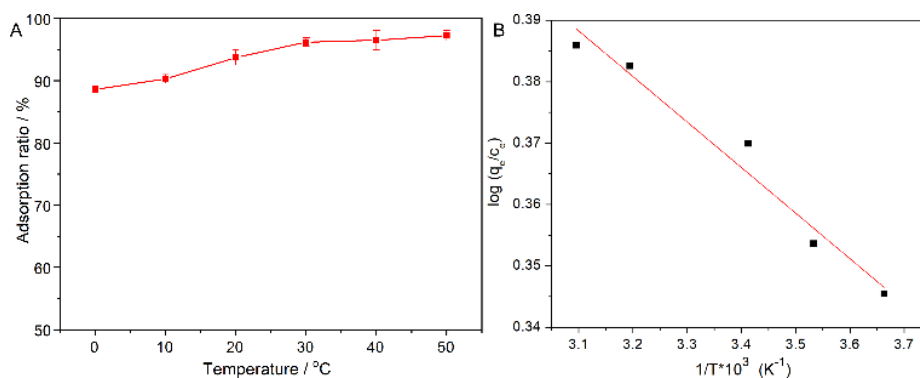

Fig. S2 (A) Interfere of solution temperature on the behavior of PmPD recovering Au(III), (B)

$$\text{Plot of } \log \frac{q_e}{c_e} \text{ versus } 1/T.$$

|                                     | Mean (mV)            | Area (%) | St Dev (mV) |
|-------------------------------------|----------------------|----------|-------------|
| <b>Zeta Potential (mV):</b> 19.7    | <b>Peak 1:</b> 19.7  | 100.0    | 5.64        |
| <b>Zeta Deviation (mV):</b> 5.40    | <b>Peak 2:</b> 0.665 | 1.1      | 1.81        |
| <b>Conductivity (mS/cm):</b> 0.0148 | <b>Peak 3:</b> 0.00  | 0.0      | 0.00        |

**Result quality:** Good

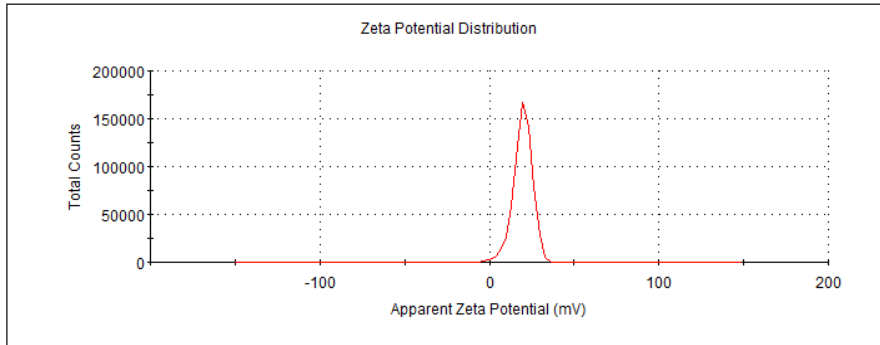

Fig. S3 Zeta potential of PmPD.

|                                     | Mean (mV)            | Area (%) | St Dev (mV) |
|-------------------------------------|----------------------|----------|-------------|
| <b>Zeta Potential (mV):</b> -28.3   | <b>Peak 1:</b> -28.2 | 100.0    | 6.68        |
| <b>Zeta Deviation (mV):</b> 6.23    | <b>Peak 2:</b> 0.00  | 0.0      | 0.00        |
| <b>Conductivity (mS/cm):</b> 0.0171 | <b>Peak 3:</b> 0.00  | 0.0      | 0.00        |

**Result quality:** Good

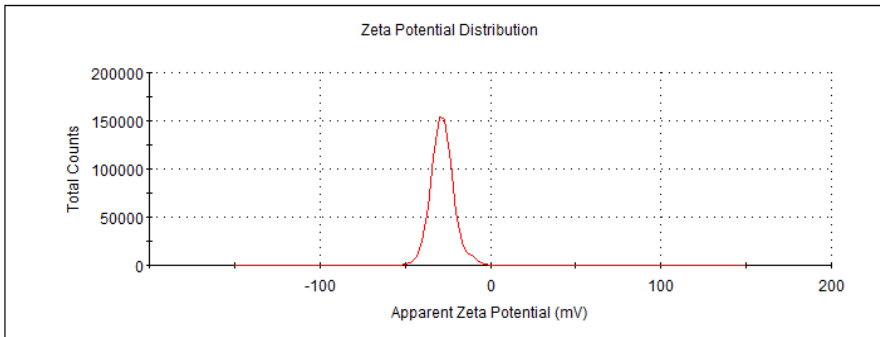

Fig. S4 Zeta potential of PmPD loaded with Au(III).

|                              | Mean (mV)    | Area (%) | St Dev (mV) |
|------------------------------|--------------|----------|-------------|
| Zeta Potential (mV): 23.9    | Peak 1: 25.7 | 89.9     | 5.67        |
| Zeta Deviation (mV): 8.00    | Peak 2: 5.98 | 10.1     | 3.61        |
| Conductivity (mS/cm): 0.0650 | Peak 3: 0.00 | 0.0      | 0.00        |

Result quality : Good

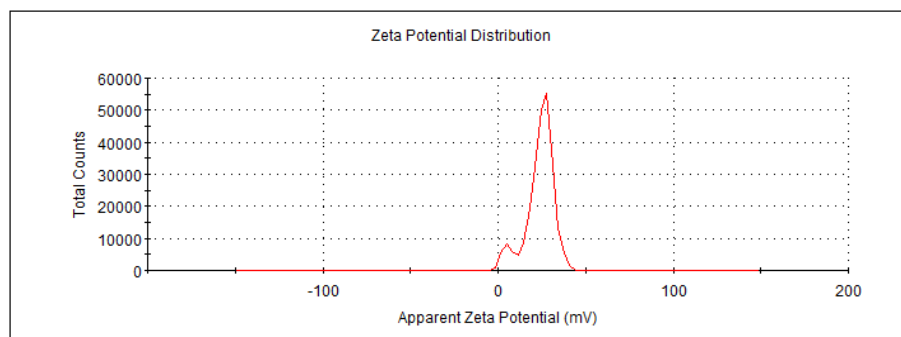

Fig. S5 Zeta potential of the regenerated PmPD.

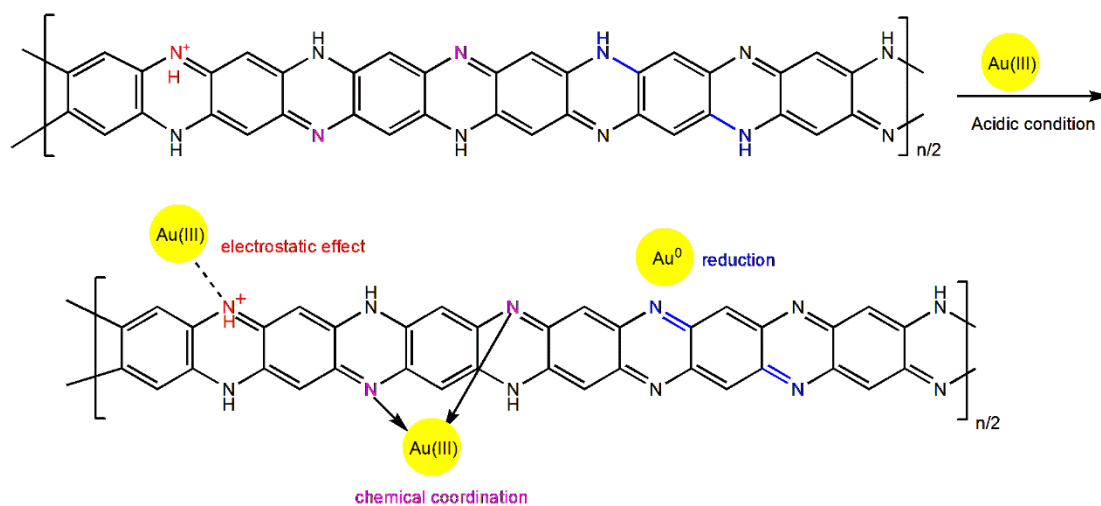

Fig. S6 Roadmap of Au(III) recycling by PmPD.

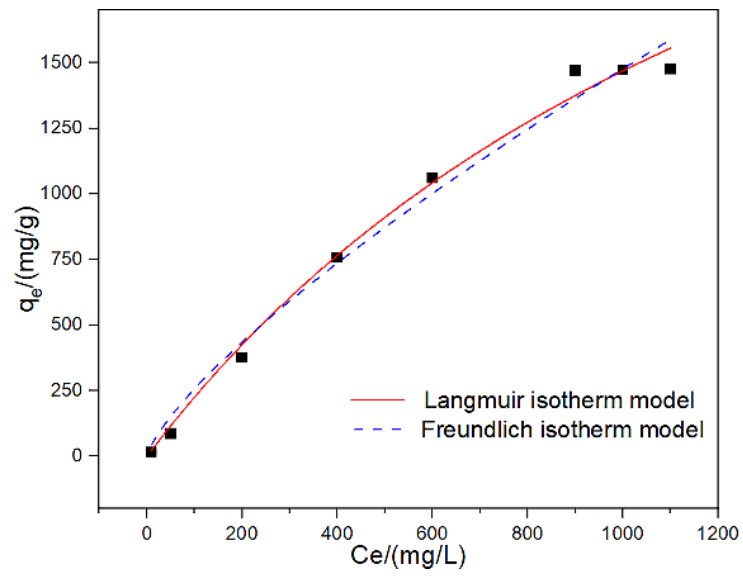

Fig. S7 Influence of time on the performance of PmPD recovering Au(III).
